# Supplementary material for: Investigation of the adsorption behavior of BSA with tethered lipid layer-modified solid-state nanopores in a wide pH range
Source: Royal Society of Chemistry journal article supplement (doi:10.1039/c9ra00698b), 2019-01-01
Supplement: c9ra00698b1.pdf [file c9ra00698b1.pdf]

Electronic Supplementary Information

## Investigation of adsorption behavior of BSA with tethered lipid layer modified solid-state nanopores in a wide pH range

Haibing Tian,<sup>a,b†</sup> Wanyi Xie,<sup>a,b†</sup> Shixuan He,<sup>a</sup> Daming Zhou,<sup>a</sup> Shaoxi Fang,<sup>a</sup> Liyuan Liang<sup>a,b\*</sup> and Deqiang Wang<sup>a,b\*</sup>

### 1. XPS measurements

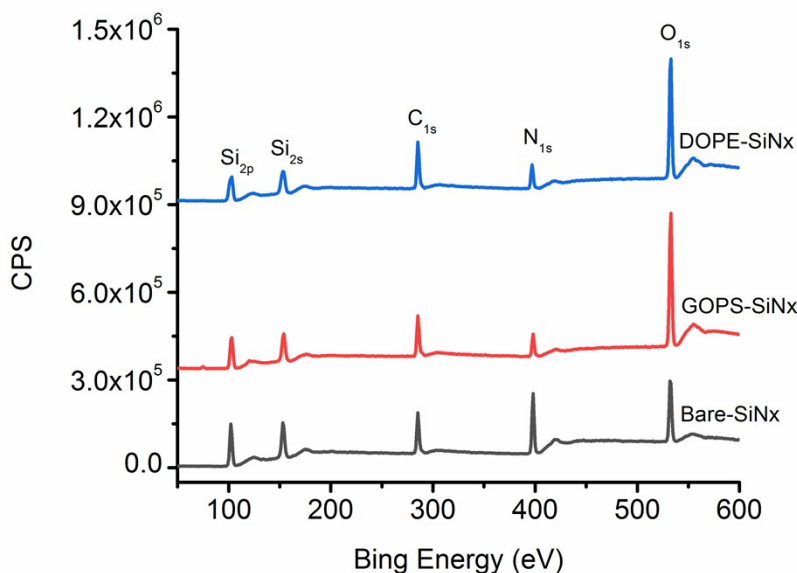

Figure S1. XPS spectra of bare-SiN<sub>x</sub> (A1), GOPS coated SiN<sub>x</sub> (A2), DOPE modified SiN<sub>x</sub> (A3)

Table S1. characterization of atom percentage for different modification steps.

| Modification steps    | Si2p (%) | C1s (%) | N1s (%) | O1s (%) | P2p (%) |
|-----------------------|----------|---------|---------|---------|---------|
| Bare-SiN <sub>x</sub> | 30.37    | 27.05   | 23.96   | 18.19   | 0.49    |
| GOPS-SiN <sub>x</sub> | 25.79    | 27.65   | 8.29    | 37.4    | 0.23    |
| DOPE-SiN <sub>x</sub> | 25.01    | 32      | 10.16   | 32.82   | ---     |

2. BSA translocation through nanopore at different pH conditions

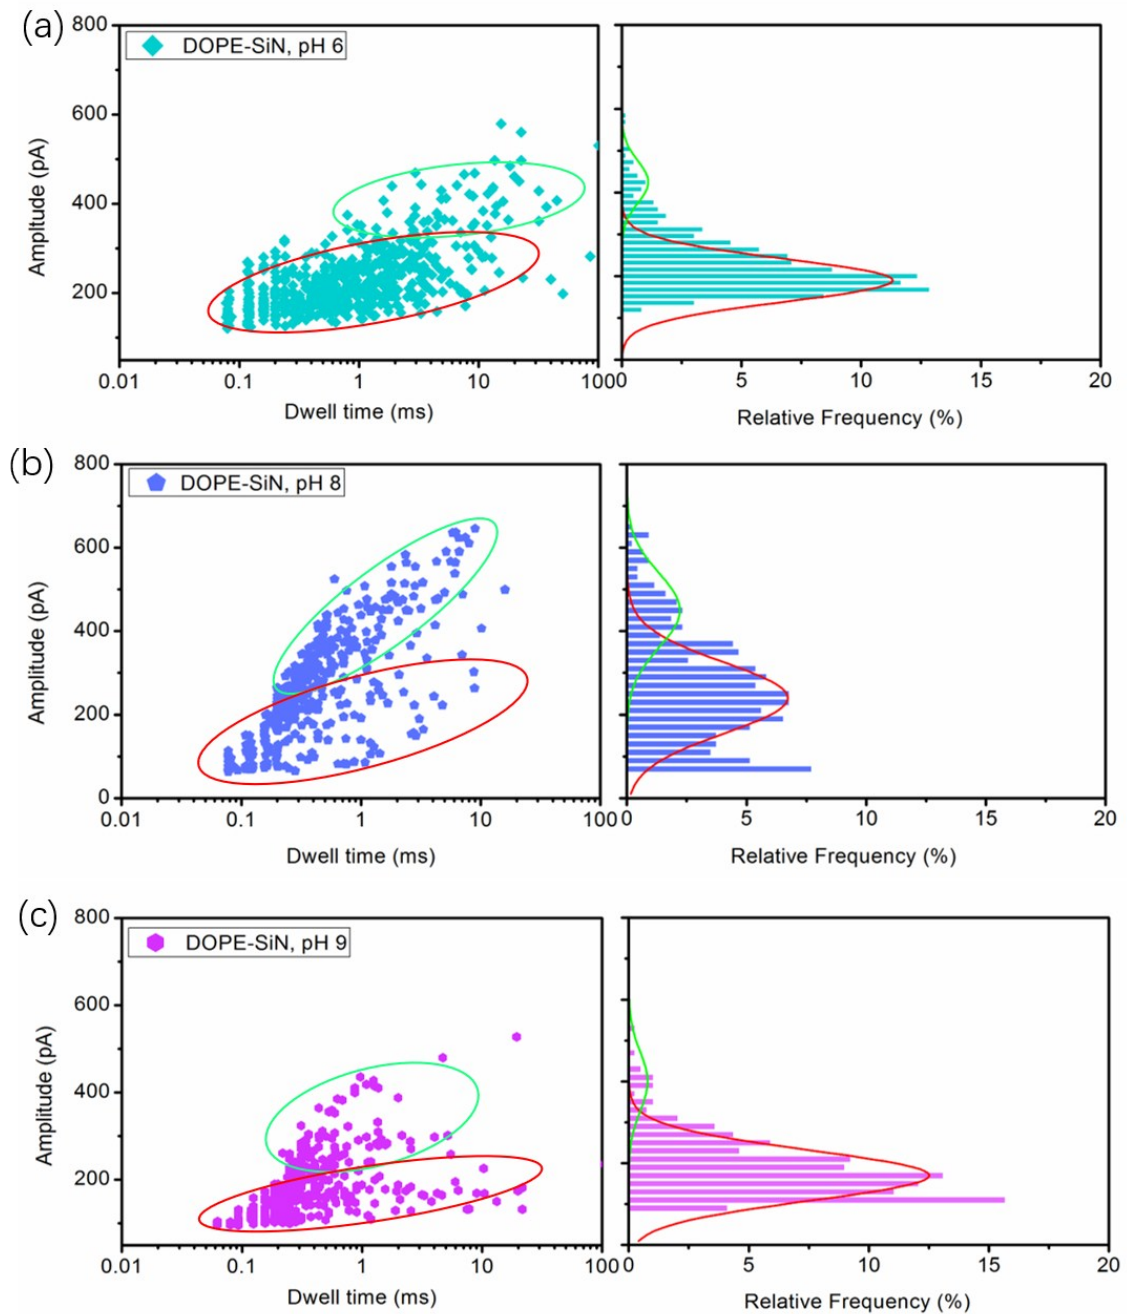

Figure S2. Event scatter plots for translocation of 0.5  $\mu\text{M}$  BSA through a 13 nm TLL-modified nanopore under 100 mV at pH 6 (a), pH 8 (b) and pH 9 (c), respectively. Amplitude histograms are fitted with Gaussian distributions
